# Supplementary material for: Vika/vox, a novel efficient and specific Cre/loxP-like site-specific recombination system
Source: PubMed Central journal article supplement — Nucleic Acids Res. 2012 Nov 7;41(2):e37. doi: 10.1093/nar/gks1037 (PMC3553980; doi:10.1093/nar/gks1037), 2012-11-07
Supplement: supp_gks1037_nar-01667-met-g-2012-File001.pdf [file supp_gks1037_nar-01667-met-g-2012-File001.pdf]

## Vika/vox, a novel efficient and specific Cre/loxP-like site-specific recombination system.

Madina Karimova<sup>1</sup>, Josephine Abi-Ghanem<sup>3</sup>, Nicolas Berger<sup>1</sup>, Vineeth Surendranath<sup>2</sup>, M. Teresa Pisabarro<sup>3</sup>, Frank Buchholz<sup>1\*</sup>

<sup>1</sup>Medical Systems Biology, University Hospital and Medical Faculty, Carl Gustav Carus, University of Technology, Fetscherstrasse 74, 01307, Dresden, Germany

<sup>2</sup>Max Planck Institute of Molecular Cell Biology and Genetics, Pfotenhauerstrasse 108, 01307 Dresden, Germany

<sup>3</sup>Structural Bioinformatics, BIOTEC TU Dresden, Tatzberg 47-51 01037 Dresden, Germany

### Supplementary Table 1. Primers used for vectors' construction.

The first column shows the primer names used in PCR reactions. The vectors that served as recipients are highlighted in bold in this column. The second column lists the sequences of the oligos used in the PCR reactions

| Primer name                              | Primer sequence 5'→3'                                                 |
|------------------------------------------|-----------------------------------------------------------------------|
| <b>pEVO vectors construction</b>         |                                                                       |
| pEVO-VloxP-up                            | ATGCTCGAGTCAATTTCCGAGAATGACAGTTCTCAGAAATTGAAAGCTTGCATGCCTGCAGA        |
| pEVO-VloxP-low                           | TTGAGATCTCAATTTCTGAGAAGTGTTCATTCTCGGAAATTGATCGAACTGTACCGGTTGTTAGTG    |
| pEVO-rox-up                              | ATGAGATCTTAACTTTAAATAATGCCAATTATTTAAAGTTAAAGCTTGCATGCCTGCAGATCGAG     |
| pEVO-rox-low                             | ttgagatcttaactttaataaattggcattatttaaagttatcgaaactgtaccggttgtagtga     |
| pEVO-vox-up                              | gtGACAGTAGATCTAATAGGTCGTGAGAACGCCATTCTCAGACGTATTGGTCTGACGCTCAGTGGAAC  |
| pEVO-vox-low                             | gtGACAGTCTCGAGgcAATACGTCTGAGAATGGGCGTTCTCAGACCTATTCGGATTTCCGCCTATTGG  |
| <b>Catalytic mutant VikaY243F</b>        |                                                                       |
| VikaY343F_up                             | cgaaaaaatggttctgcgcttttggctgcctcatctgcatg                             |
| VikaY343F_low                            | catgcagatgacgaccaaacgcagaaccatttttttcg                                |
| <b>NLS protein tagging (N-terminal)</b>  |                                                                       |
| NLS-VCre-up                              | AATGTGTACAGCCACCATGaagaagaagaggaaaggtgATCGAGAACCAGCTGAGC              |
| NLS VCre-low                             | GACTCTAGAGTTTAATTAATCATTTATATGC                                       |
| <b>FLAG protein tagging (C-terminal)</b> |                                                                       |
| Flag-Vika-up                             | CTCTGTACAATGACCGATCTGACCCCGT                                          |
| Flag-Vika-low                            | ACCTCTAGATTActtgtcatcgtcatccttgtaatcACGCTGACGACGTTTCTGTGCC            |
| <b>pSV vectors construction</b>          |                                                                       |
| 1-pSV-up                                 | ACAATTAATAGACTGGATGGAGG                                               |
| 1-pSV-VloxP-low                          | TGCAAGCTTCAATTTCTGAGAAGTGTTCATTCTCGGAAATTGATCGAACTGTACCGGTTGTTAG      |
| 2-pSV-VloxP-up                           | ctggatcctcaatttccgagaaatgacagttctcagaaattgaACCGGGCCACCATGGTCGCGAGTAGC |
| 2-pSV-low                                | CAGGATATCCTGCACCATCGTCTGCTCATC                                        |
| 1-pSV-vox-low                            | TGCAAGCTTAATACGTCTGAGAATGGGCGTTCTCAGACCTATTTGCAACTGTACCGGTTGTTAG      |
| 2-pSV-vox-up                             | ctggatccAATAGGTCTGAGAACGCCATTCTCAGACGTATTACCGGGCCACCATGGTCGCGAGTAGC   |
| <b>pD vectors</b>                        |                                                                       |
| R6K-loxP-up                              | actTCTAGAATAACTTCTGTATAGCATAATTATACGAAGTTATgggtctgacgctcagtggaac      |
| R6K-VloxP-up                             | actTCTAGATCAATTTCCGAGAATGACAGTTCTCAGAAATTGAggtctgacgctcagtggaac       |
| R6K-rox-up                               | actTCTAGATAACTTTAAATAATTTGGCATTATTTAAAGTTAggtctgacgctcagtggaac        |
| R6K-vox-up                               | actTCTAGAAATAGGTCGTGAGAACGCCATTCTCAGACGTATTgggtctgacgctcagtggaac      |
| R6K-low                                  | actCTCGAGGAAATGTGCGCGGAACCC                                           |
| <b>pRK-eGFP vectors</b>                  |                                                                       |
| pRK-VloxP-up                             | ggaagatctTCAATTTCCGAGAATGACAGTTCTCAGAAATTGAAAGCTTAGGTGGCACTTTTCG      |
| pRK-VloxP-low                            | TCCctcgagTCAATTTCTGAGAAGTGTTCATTCTCGGAAATTGATATCGACAGAGTGCCAGCC       |
| pRK-vox-up                               | ggaagatctAATAGGTCGTGAGAACGCCATTCTCAGACGTATTAAAGCTTAGGTGGCACTTTTCG     |
| pRK-vox-low                              | TCCctcgagAATACGTCTGAGAATGGGCGTTCTCAGACCTATTTATCGACAGAGTGCCAGCC        |
| <b>pBabe retroviral vectors</b>          |                                                                       |
| pBabe-psi-mid-up                         | GGTACTAGTTAGCTAACTAGCTCTGTATCTGG                                      |
| pBabe-XhoI-EcoRI-low                     | GGCGAATTCatacagatctctcgagCTACGTACCACCACACTGG                          |
| pNPK-rec-xhoI-up                         | gtcCTCGAGGCTCAGGAGGAATGTACAG                                          |
| Cre/173-XhoI-up                          | TAGctcgagtccaatttactgaccgtac                                          |
| Cre-EcoRI-low                            | AGAGAATTCGACTCTAGAGCTAATCGCCATCTTCCAGCAG                              |
| pNPK-Vika-EcoRI-low                      | AGAGAATTCgacTCTAGAttaCCGCTGTCTCCGCTTC                                 |

**Supplementary Table 2.** Sequences of the proposed recombinases and their target sites.

Amino acid sequences and accession numbers of putative tyrosine site-specific recombinases are depicted in the first column of the table. Target sites for the putative recombinases were predicted and their DNA sequences are shown corresponding to each recombinase in the second column. The origin of each system is shown in the third column as the name of the organism, strain and name of plasmid, if applicable. Amino acid identity of proposed recombinases was compared to Vika (A) or Cre (B) and is shown as percentage in the last column.

| GenBank Accession number<br>Amino acid sequence                                                                                                                                                                                                                                                                                                                                                                                                               | Putative target site                         | Origin                                                | Sequence identity (%) to<br>(A)Vika<br>(B)Cre |
|---------------------------------------------------------------------------------------------------------------------------------------------------------------------------------------------------------------------------------------------------------------------------------------------------------------------------------------------------------------------------------------------------------------------------------------------------------------|----------------------------------------------|-------------------------------------------------------|-----------------------------------------------|
| EGU56467.1<br><br>MTTLSVLSEVPFERLLPHEFAEGLAAQRAGEALEG<br>HPLVEAAITHYQGEFFRRAERLQPASLVRLKSAWAT<br>FVAWCEQDRCALPASPQTVEAYLIAEQDRLHRNTL<br>KVQLWAIGKTHQISGCPDPCHNDYVKAQLQOIHHRK<br>VRQREVIRQAVLRESHLNALADLWDRPEASLTECR<br>DLLIVSMLYETLLRKSNETLRVGDVDWQADGSGLI<br>KVFTKTDKSGDVKYSYVSPSTMDLLARYLGHADIV<br>DNPEAFLIQRVKLSSQQLKGSARTQAAISPVSAKLI<br>GRVCAKAAKTLGLSTDRPFTGHSARVGTQDILLAEG<br>FSSLQVQAGGWSSERMVLRYGGSVLASESAMAQRR<br>QRKSPK                            | CATACGTCCTAGA <b>AATGGCAGT</b> TCTAGGACGTATT | Vibrio tubiashii<br>ATCC 19109                        | (A) 50<br>(B) 23                              |
| YP_003065675.1<br><br>MELVATDSAAEPQRDAFNPPVPFADALPPGLELLIE<br>RLEQHARAARGAFADNTVRLAADSRIFAAWCREEG<br>RAMLPATPETVAAFIDAQGETKARATVERYRSSIAA<br>LHRAAGLPNPCADEIVRLAVKRMNRARGRRQQAEP<br>LNRASIERMLEVKTPGRLHRRVTEAKRETPLIALRN<br>AALVAVAYDILLRSELVSLYIGDLHKGADGSGTVL<br>VRRSKADQEGEGAIKYLAPDTMAHIEAWLSAAHLES<br>GPLFRPLTKGGQVGTVALGGGEVARVFRDLATAAGL<br>KLARLPSGHSTRVGATQDMFAAGFELLEVMQAGSWK<br>TPAMPARYGERLRAQRGAARKLATLQNR                                       | ATTTCCCGCGATAG <b>ATGGTGT</b> TATCGCAGGCAAT  | Methylobacterium<br>extorquens DM4<br>plasmid p1METDI | (A) 23<br>(B) 24                              |
| YP_003280920.1<br><br>MTEHDQGEVVDAELVDDQLPALRNQAQAPAVPAPKN<br>DPDAWLSDAQAREVDKAGIADGTRDGYKGDMERFAAW<br>CTSAGRRPMPAAPQTVTEYLSYLKHTPRPRTNKPYG<br>PNSMDRIIAAIRSAHRAAGHEPPDTMGARKVVLGYR<br>AELSERKDPAKPRKATPADRAVLRALAELEDRATL<br>AGORDAALMLLGHALASRGSELVPLNIPDSFTDLPD<br>GGFSVAVYRKKRKCWQDVTVVLDPPDLCAVRVRR<br>LVATLADNGHHTGPLFLMRDRWGYLAPPMHRNGKPI<br>GDPTGRMTVEAASDIVQRSIERTGIPGRWRSHSSRR<br>GFVKSARQAGVDIVQIGRHGGWDDKSKALIGYIDEE<br>DAQDNNPLVQIGRKAALPPDAASGT | GTTGCCCCCGTCG <b>CGCGGT</b> CGCGTTGGGGGCAAC  | Streptomyces sp. W9<br>plasmid pCQ3                   | (A) 14<br>(B) 15                              |
| ZP_06822377.1<br><br>MAIRRGALTSGPDRAKLSAGAVAAMEKGIPPETRRG<br>YAGDWQRFEAWAFGEGACPLPCSAETLLEYVTFITV<br>FPRPRTGMPYEPAPIERAMAAIAVAHKAAGFAPPDT<br>TGARLVLRGYERELKETKDPGRVAKAAAAATPLILR<br>TMIHTDITTPIGLRDAAAMTNGFALAARSSEAKLL<br>DWEDTADVEQGLELDYRPKVNDQPLGVPYGYAPS<br>TCPVRRHLHAWRQCLLDLGYPVSGPIYVRINRHGHIN<br>PPMTRRGLPIGDPSGRMTTEGIAEIVTRAARAGLT<br>AVPDDLLPSLPPRWSGHSLRRGYAKAAREAGKDMLE<br>SGRHGGWADGSRAFYFDRAAIWDEDLNLPLFGIGL                                 | CTGGCTCTTGGTA <b>AAGGCACGT</b> TATCAAGAGCCAA | Streptomyces sp.<br>SPB74                             | (A) 8<br>(B) 13                               |
| NP_395953.2<br><br>MTDQDVETLRHLVNOGMGDNTLRALTSDLAYLEAWG<br>LATTGSSSLPWPAPALLLKFVAHHLWDPEKRATDPD<br>HGMPAAVDENLRQGFRLRSVGHAPSTVRRRLANWS<br>TLTRWRGLHGAFASPALKSAIRLAVRAVPRTRARKS<br>AKAVTGDVLAKLLATCESDSLRLDRDKAILMVAFAS<br>GRRRSEIAGLRREQLTIEAPIETEGGPPLPSLAIH<br>LGRTKTTSGEEDDTVFLTGRPVEALNAWLAALKIDK                                                                                                                                                         | AGCCATCAAGAT <b>GGCAGACG</b> CCATCTTGATGGCT  | Agrobacterium<br>tumefaciens str.<br>C58 plasmid At   | (A) 14<br>(B) 15                              |

|                                                                                                                                                                                                                                                                                                                                                                                                                                                                                              |                                     |                                                  |                   |
|----------------------------------------------------------------------------------------------------------------------------------------------------------------------------------------------------------------------------------------------------------------------------------------------------------------------------------------------------------------------------------------------------------------------------------------------------------------------------------------------|-------------------------------------|--------------------------------------------------|-------------------|
| GSVFRGIGRWGTVSRRALDPQSVNAILKQRAEMAGL<br>EAGQFSAHGLRSGYLTEANRGIPLPEAMEQSRHRS<br>VQOASSYNSATRRSGRAARLL*                                                                                                                                                                                                                                                                                                                                                                                        |                                     |                                                  |                   |
| YP_666181.1<br><br>MTRIAAFDGRSAEFVAPRLRLPNHARISTMTNTVHQ<br>PADDLPDIVDLVKEMCRPTQLERQSGSDKPNPPALP<br>AAHRAENQIPSHLDGLADRARGYVEAASSNTRRAY<br>ASDWKHFASWCRRQGFSLMPPDPQTVGLYITQAQASA<br>SGRDKKS SVSTIERRLSLWYNSQRGQPLDRKDRHI<br>ATVMAGIRNKHASP PRQKEAILRDDL VAMLETLD RG<br>SLRGLRDRAMLLLG FAGGLRRSEI VGLDVAR DQTED<br>GRGWIEILDKGMVSLRGKTGWREVEIGRGSSDATC<br>PIVALETWMKFARIAHGPFVFRVTGQSKAVGADRLK<br>DQEVARLVKRAALAAGVGRDLP EGERGQKFAGHSLR<br>AGLASSAEVDERYVQQLGHASAE MTRKYQRRDRF<br>RVNLT KASGL* | ACATCGAGCGGCTCCGCGACGAACCGCGCATGT   | Chelativorans<br>sp_ BNC1<br>plasmid 3           | (A) 15<br>(B) 18  |
| YP_957160.1<br><br>MNENSHKKPPDLTLRNEGS AVSIHMESEALRHYLQA<br>ATTDNTRKAYRS AIRQFEKWGRLPTDRD TVVRYLL<br>SKAKSLNSRTLNLHLTAIGQWHHYQGITDPVRDPLV<br>RKTMDGIRRHGQPKRKAKALRLEHIAQMVKHLQRL<br>PDCNKKYRDIAMVLTGFFGAFRRSELVAIRVSDLIW<br>EPEGLI IKMPSRKT DQEA EGLMRALPF GDVAVCPVQ<br>ALKSWLEEA EIREGPVFRPVNRWDQIQPRPLTPSSI<br>NDLLKALGKACDFDIHELSSHFRRLGSLTSAARER<br>IDFELIKKQGGWRS DATVWAYVEEGQQLSENAAVVL<br>MEKLQALMKPEPNQEHSTGAIIE*                                                                    | CTAACCCACGATAATCAATCTTATCGGGGTAA    | Marinobacter<br>aquaeolei VT8<br>plasmid pMAQU02 | (A) 14<br>(B) 20  |
| NP_943161.1<br><br>MSIICGTHGLNRRFVMTAGNNDENLPTRRHEEPTVL<br>ARTPGTLTTPQLAEQHQRFLAAATDNTRRTYRSA<br>IRHFLAWGGVLPCEAALIRYLLSFAEVLNPRTLAL<br>RLTALSQWHRYQGFDPPTASATVGKTLRGIERVNGR<br>PRQKAKALVLEDLERIVVHLNTLDGLATLRDSALLQ<br>VGYFGAFRRSELVTLEMQYLEWEQEGLRITLPRSKT<br>DQEGEGLDKAIPYGDSICCPATALRRWLDAAQIVQG<br>PLFRIRSRWGLGEVALHEGSVNTILTARAEAGLL<br>YVPELSSHSLRRGLATS AHRAGADFL EIKRQGGWRH<br>DGTVHGYIEEAGAFEENAAGSLLRRKP*                                                                         | TTGACCCACGATAAGCGCGGTATTCGTGAGTTAA  | Pseudomonas sp.<br>ND6 plasmid pND6-1            | (A) 18<br>(B) 21  |
| ZP_05884863 (Vika)<br><br>MTDLTPFPPLHLEPDEFADLVKAIKRDPQAGAHP<br>AIQSAISHFQDEFVRRQGEWQPATLQRLRNAWNVFV<br>RWCTHQGIPALPARHQDVERYLIERRNELHRNTLKV<br>HLWAI GKTHVISGLPNCAHRYVKAQMAQITHQKVR<br>ERERIEQAPAFRESLDRLTELWSATRSVTQQRDLM<br>IVSLAYETLLRKNLEQMKVGDIEFCQDGSALITIP<br>FSKTNHSGRDDVVRWISPOVANQVHAYLQLPNIDADP<br>QCFLQRVKRSGKALNPESHNTLNHHPVSEKLISR<br>VFERAWRALNHETGPRYTGHSARVGAADLLQEGYS<br>TLQVMQAGGWSSEKMLRYGRHLHAHTSAMAQKRRQ<br>R                                                         | AATAGGTCTGAGAACGCCCATTTCTCAGACGTATT | Vibrio<br>coralliilyticus<br>ATCC BAA-450        | (A) 100<br>(B) 26 |

**Supplementary Table 3.** List of the Cre residues contacting DNA and their corresponding residues in Vika, grouped into 3 categories. The residues before the slash relate to Cre and after the slash to Vika, respectively. Group I contains the catalytic residues. Group II covers the residues interacting specifically either with the minor groove (mG) or the major groove (MG). In group III are the residues interacting with the phosphate backbone (non-specifically) of the DNA. Red labeling highlights the conserved residues in the alignment. In orange are semi-conserved residues. In blue are the conserved and semi-conserved residues identified in a 3D alignment between the Vika model and the Cre template.

| Catalytic Residues | Specific Interaction |           | Non specific Interaction |
|--------------------|----------------------|-----------|--------------------------|
|                    | mG                   | MG        |                          |
| R173/R153          | K201/K181            | H40/-     | F37/W18                  |
| H289/H270          | R243/K223            | K43/R25   | S38/Q19                  |
| R292/R273          | K244/R224            | K86/R65   | T41/T22                  |
| W315/W296          | R282/-               | Q90/K69   | M44/-                    |
| Y324/Y305          |                      | R259/K246 | S47/N28                  |
|                    |                      |           | R50/-                    |
|                    |                      |           | R81/R59                  |
|                    |                      |           | L83/L63                  |
|                    |                      |           | A84/H64*                 |
|                    |                      |           | T87/T67                  |
|                    |                      |           | M97/K77                  |
|                    |                      |           | R100/-                   |
|                    |                      |           | R101/-                   |
|                    |                      |           | R118/-                   |
|                    |                      |           | R121/H102                |
|                    |                      |           | K122/R106                |
|                    |                      |           | A131/I111                |
|                    |                      |           | K132/R110*               |
|                    |                      |           | R154/R133                |
|                    |                      |           | Q156/Q137                |
|                    |                      |           | R159/R139                |
|                    |                      |           | I174/K154                |
|                    |                      |           | A175/N155                |
|                    |                      |           | R241/R221                |
|                    |                      |           | V242/V222                |
|                    |                      |           | N245/S225                |
|                    |                      |           | S257/S244                |
|                    |                      |           | A260/-                   |
|                    |                      |           | E262/E245*               |
|                    |                      |           | K276/R266*               |
|                    |                      |           | Y283/-                   |
|                    |                      |           | S287/T268                |
|                    |                      |           | G288/G269                |
|                    |                      |           | R326/R307                |

Vika  
VCre

**Supplementary Figure 1.** Amino acid alignment of Vika and VCre. The ClustalX coloring scheme was used to highlight the conservation between the two recombinases.

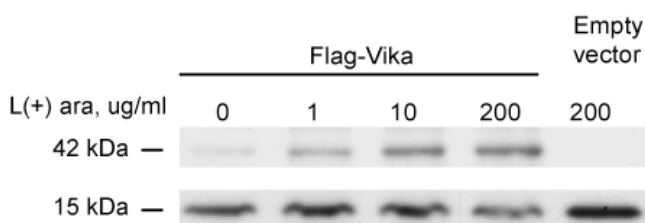

**Supplementary Figure 2.** L(+)-arabinose-induced expression of the Vika recombinase in *E. coli*. Western blot shows concentration-dependent (0, 1, 10, 200 mg/ml L(+)-arabinose) increase of the protein amount in the lysate of the bacterial cells. Cells grown in the presence of an empty vector served as control. A non-specific cross-reacting protein served as loading control (lower panel).

**Supplementary Table 4.** Sequences of the SeLOX-predicted recombination sites for Vika recombinase. Search was done in 10 kb genome sequence surrounding gene coding for Vika. Putative spacer sequences are depicted in bold.

| lox-like candidate site | Nucleotide sequence                        |
|-------------------------|--------------------------------------------|
| <i>lox-1</i>            | ACAAAAAAGAGG <b>CCAATCGG</b> CCTCTTTTTTTGT |
| <i>lox-2</i>            | TTATTCGATTTAG <b>TAAATAC</b> CAAACGAATAA   |
| <i>lox-3</i>            | CTGCTCGTACCG <b>GGCCAC</b> CCGGTACGAGCCT   |
| <i>lox-4 (vox)</i>      | AATAGGTCTGAGA <b>ACGCCA</b> TCTCAGACGTATT  |
| <i>lox-5</i>            | AACCGTGTTCTTT <b>CATCGT</b> CAAAGCACACCGT  |
| <i>lox-6</i>            | CTAGGCGGTGGGT <b>TGACAC</b> ACCCACTGCCTAT  |

Search pattern:

pseudo-vox NNNNNNNNGAGA NNNNNNNN TCTCNNNNNNNNN  
 pseudo-loxP NNNNNNNNTATA NNNNNNNN TATANNNNNNNNN

total amount of max 16 mismatches to wt site

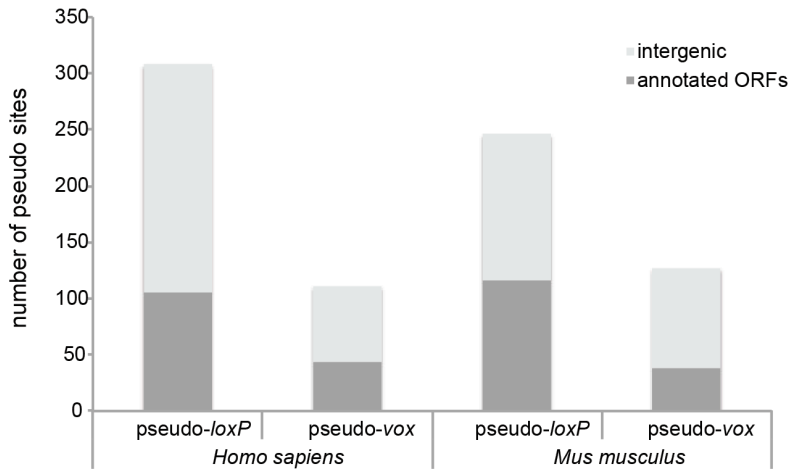

**Supplementary Figure 3.** Nucleotide analysis of the mouse and human genomes for the presence of the *loxP*- and *vox*-like sequences according to the search pattern depicted (see Results section for description).

vox-like cryptic chromosomal sites

| Site                          | Alignment                                                                                                                                                                                                                 | #of mutations |
|-------------------------------|---------------------------------------------------------------------------------------------------------------------------------------------------------------------------------------------------------------------------|---------------|
| <i>voxCH18</i><br><i>vox</i>  | CAGAGCTCTGAGA <b>CTTTGTGT</b> TCTCA <b>A</b> AGATATC<br>AATAGGTCTGAGA <b>ACGCCCAT</b> TCTCAGACGTATT<br>* ** * <b>*</b> * <b>*</b> * <b>*</b> * <b>*</b> * * * <b>*</b> * <b>*</b> * <b>*</b> *                            | 7             |
| <i>voxCH21</i><br><i>vox</i>  | AAGAGGT <b>G</b> TGAGA <b>CTGAATTT</b> TCTCAG <b>T</b> CAGGTT<br>AATAGGTCTGAGA <b>ACGCCCAT</b> TCTCAGACGTATT<br>** * <b>*</b> * <b>*</b> * <b>*</b> * <b>*</b> * * * <b>*</b> * <b>*</b> * <b>*</b> * <b>*</b> *          | 6             |
| <i>voxCHX</i><br><i>vox</i>   | AAGAG <b>A</b> ACTGAGA <b>AAATATTC</b> TCTCAGAG <b>G</b> GAA <b>T</b><br>AATAGGTCTGAGA <b>ACGCCCAT</b> TCTCAGACGTATT<br>** ** * <b>*</b> * <b>*</b> * <b>*</b> * <b>*</b> * * <b>*</b> * <b>*</b> * <b>*</b> * <b>*</b> * | 6             |
| <i>voxCMp92</i><br><i>vox</i> | AACAG <b>C</b> TTTGAGA <b>GCTGTTGC</b> TCTCAG <b>C</b> TGAATT<br>AATAGGTCTGAGA <b>ACGCCCAT</b> TCTCAGACGTATT<br>** ** * <b>*</b> * <b>*</b> * <b>*</b> * <b>*</b> * * <b>*</b> * <b>*</b> * <b>*</b> * <b>*</b> *         | 6             |
| <i>voxCHp3</i><br><i>vox</i>  | AACAG <b>G</b> ACTGAGA <b>TAAAACAG</b> TCTCAGAC <b>A</b> GCAT<br>AATAGGTCTGAGA <b>ACGCCCAT</b> TCTCAGACGTATT<br>** ** * <b>*</b> * <b>*</b> * <b>*</b> * <b>*</b> * ** <b>*</b> * <b>*</b> * <b>*</b> * <b>*</b> *        | 6             |

loxP-like cryptic chromosomal sites

|                                |                                                                                                                                                                                                                                                                                              |   |
|--------------------------------|----------------------------------------------------------------------------------------------------------------------------------------------------------------------------------------------------------------------------------------------------------------------------------------------|---|
| <i>loxhXp22</i><br><i>loxP</i> | ACAAC <b>C</b> ATT <b>T</b> TATA <b>ATATATAA</b> TATA <b>T</b> GAT <b>G</b> TTTAT<br>ATAAC <b>T</b> TCGTATA <b>GCATACAT</b> TATA <b>C</b> GAA <b>G</b> TTAT<br>* ** <b>*</b> * <b>*</b> * <b>*</b> * <b>*</b> * ** <b>*</b> * <b>*</b> * <b>*</b> * <b>*</b> *                               | 7 |
| <i>loxM5</i><br><i>loxP</i>    | <b>G</b> TAACT <b>G</b> AGTATA <b>TGCATATA</b> TATA <b>C</b> G <b>T</b> A <b>T</b> A <b>T</b> A <b>T</b><br>ATAAC <b>T</b> TCGTATA <b>GCATACAT</b> TATA <b>C</b> GAA <b>G</b> TTAT<br>* <b>*</b> * <b>*</b> * <b>*</b> * <b>*</b> * <b>*</b> * * <b>*</b> * <b>*</b> * <b>*</b> * <b>*</b> * | 5 |

**Supplementary Figure 4.** Nucleotide sequence alignment of the cryptic chromosomal target sites compared to wild-type *vox* or *loxP*. Capital H or M in the name of cryptic *vox* sites indicates human or mouse origin. Putative spacer sequences are depicted in bold. Mismatches in the chromosomal sites are highlighted in red. Total count of mismatches in the inverted repeats is depicted on the right hand side of the alignment.

A

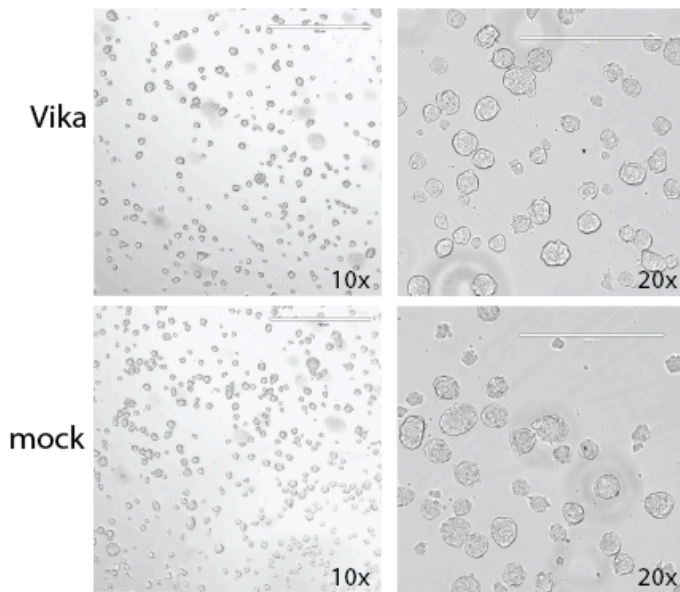

B

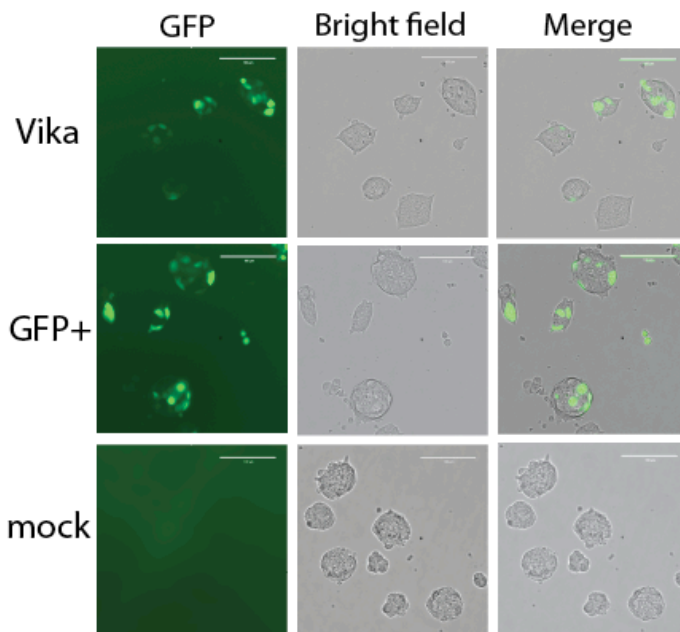

**Supplementary Figure 5.** Evaluation of prolonged expression of Vika in mouse ES cells. **(A)** mES cell line with stably integrated Vika recombinase after prolonged passaging (24 days). A representative photo of a clonal culture is depicted. **(B)** Recombination activity of stably expressed Vika recombinase in mES cell line. Images show cells 24 hours after transfection with vox-GFP reporter plasmid. Note the apparent Vika-mediated recombination signified through GFP expression. A control of the recombined reporter plasmid (GFP+) was transfected for detecting transfection efficiency.

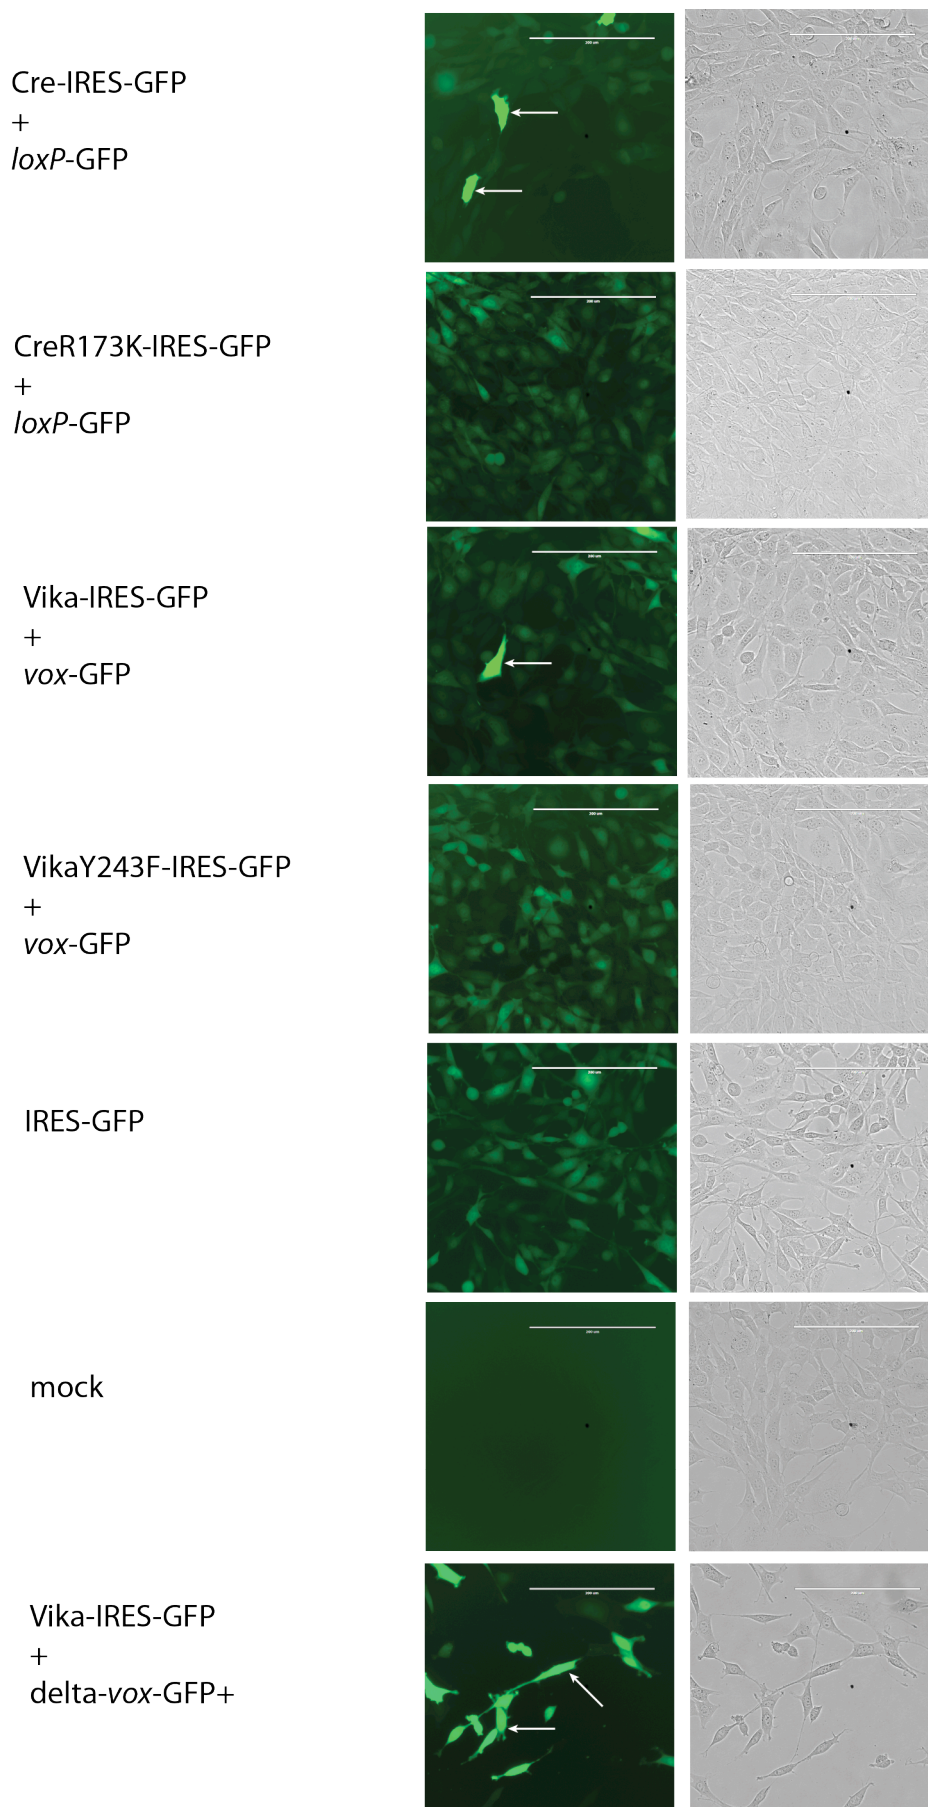

**Supplementary Figure 6.** Recombination test of NIH3T3 cells infected with viruses expressing respective recombinases. Reporter plasmids specific to the recombinases carry recombination sites (*loxP* or *vox*). eGFP is expressed upon recombination. A control reporter plasmid (delta-*vox*-GFP+) constitutively expressing eGFP was used as transfection control. Cells were imaged for EGFP expression (green), 24 hours after cotransfection with reporter plasmids. Cells with reporter-mediated eGFP expression are marked with an arrow.
